# Supplementary material for: PGMA-based gene carriers with lipid molecules
Source: Royal Society of Chemistry journal article supplement (doi:10.1039/c6bm00360e), 2016-01-01
Supplement: c6bm00360e1.pdf [file c6bm00360e1.pdf]

## Supporting Information

### PGMA-based gene carriers with lipid molecules

**Chen Xu,<sup>a,b,c,#</sup> Bingran Yu,<sup>a,b,c,#</sup> Hao Hu,<sup>a,b,c</sup> Muhammad Naeem Nizam,<sup>a,b,c</sup> Wei**

**Yuan,<sup>d,\*</sup> Jie Ma,<sup>d</sup> and Fu-Jian Xu<sup>a,b,c,\*</sup>**

<sup>a</sup>State Key Laboratory of Chemical Resource Engineering, Beijing University of Chemical Technology (BUCT), Beijing 100029 China

<sup>b</sup>Key Laboratory of Carbon Fiber and Functional Polymers (Beijing University of Chemical Technology), Ministry of Education, Beijing 100029 China

<sup>c</sup>Beijing Laboratory of Biomedical Materials, Beijing Advanced Innovation Center for Soft Matter Science and Engineering, Beijing University of Chemical Technology, Beijing 100029 China

<sup>d</sup>State Key Laboratory of Molecular Oncology, Cancer Hospital, Chinese Academy of Medical Sciences, Beijing 100021, China

<sup>#</sup>Both authors contributed equally to this work.

\*To whom all correspondence should be addressed:

E-mail: xufj@mail.buct.edu.cn (F J Xu), yuanwei7568@163.com (W. Yuan)

**Table S1** Characterization of polymers.

| Samples                | Volume of GMA (mL) | $M_n$ (g/mol) <sup>d</sup> | PDI <sup>d</sup> | Monomer repeat units per chain |                 |
|------------------------|--------------------|----------------------------|------------------|--------------------------------|-----------------|
| CHO-PGMA1 <sup>a</sup> | 1.73               | $4.60 \times 10^3$         | 1.21             | 28 <sup>e</sup>                | 25 <sup>h</sup> |
| CHO-PGMA2 <sup>a</sup> | 3.46               | $8.80 \times 10^3$         | 1.23             | 58 <sup>e</sup>                | 56 <sup>h</sup> |
| CHO-PGMA3 <sup>a</sup> | 5.19               | $1.35 \times 10^4$         | 1.30             | 92 <sup>e</sup>                | 90 <sup>h</sup> |
| PI-PGMA1 <sup>b</sup>  | 0.91               | $4.50 \times 10^3$         | 1.31             | 24 <sup>f</sup>                | 27 <sup>h</sup> |
| PI-PGMA2 <sup>b</sup>  | 1.82               | $9.10 \times 10^3$         | 1.21             | 57 <sup>f</sup>                | 56 <sup>h</sup> |
| PI-PGMA3 <sup>b</sup>  | 2.73               | $1.48 \times 10^4$         | 1.22             | 97 <sup>f</sup>                | 94 <sup>h</sup> |
| PGMA1 <sup>c</sup>     | 3.20               | $4.70 \times 10^3$         | 1.22             | 32 <sup>g</sup>                |                 |
| PGMA2 <sup>c</sup>     | 6.40               | $9.75 \times 10^3$         | 1.21             | 68 <sup>g</sup>                |                 |

<sup>a</sup>Synthesized using a molar feed ratio [CHO-Br (200 mg, 0.37 mmol)]/[CuBr (53 mg, 0.37 mmol)]/[PMDETA (193  $\mu$ L, 0.93 mmol)] of 1:1:2.5 in 5 mL of DMSO containing different amounts of GMA for 30 min.

<sup>b</sup>Synthesized using a molar feed ratio [PI-Br (200 mg, 0.18 mmol)]/[CuBr (26 mg, 0.18 mmol)]/[PMDETA (94  $\mu$ L, 0.45 mmol)] of 1:1:2.5 in 5 mL of DMSO containing different amounts of GMA for 30 min.

<sup>c</sup>Synthesized using a molar feed ratio [ethyl 2-bromoisobutyrate (100  $\mu$ L, 0.67 mmol)]/[CuBr (96 mg, 0.67 mmol)]/[PMDETA (349  $\mu$ L, 1.67 mmol)] of 1:1:2.5 in 5 mL of DMSO containing different amounts of GMA for 30 min.

<sup>d</sup>Determined from GPC results. PDI=weight average molecular weight/number average molecular weight, or  $M_w/M_n$ .

<sup>e</sup>Determined from  $M_n$  and the molecular weights of CHO-Br(536 g/mol) and GMA (142g/mol).

<sup>f</sup>Determined from  $M_n$  and the molecular weights of PI-Br(1097 g/mol) and GMA (142g/mol).

<sup>g</sup>Determined from  $M_n$  and the molecular weights of ethyl 2-bromoisobutyrate (195 g/mol) and GMA (142g/mol).

<sup>h</sup>Determined from the <sup>1</sup>H NMR data.

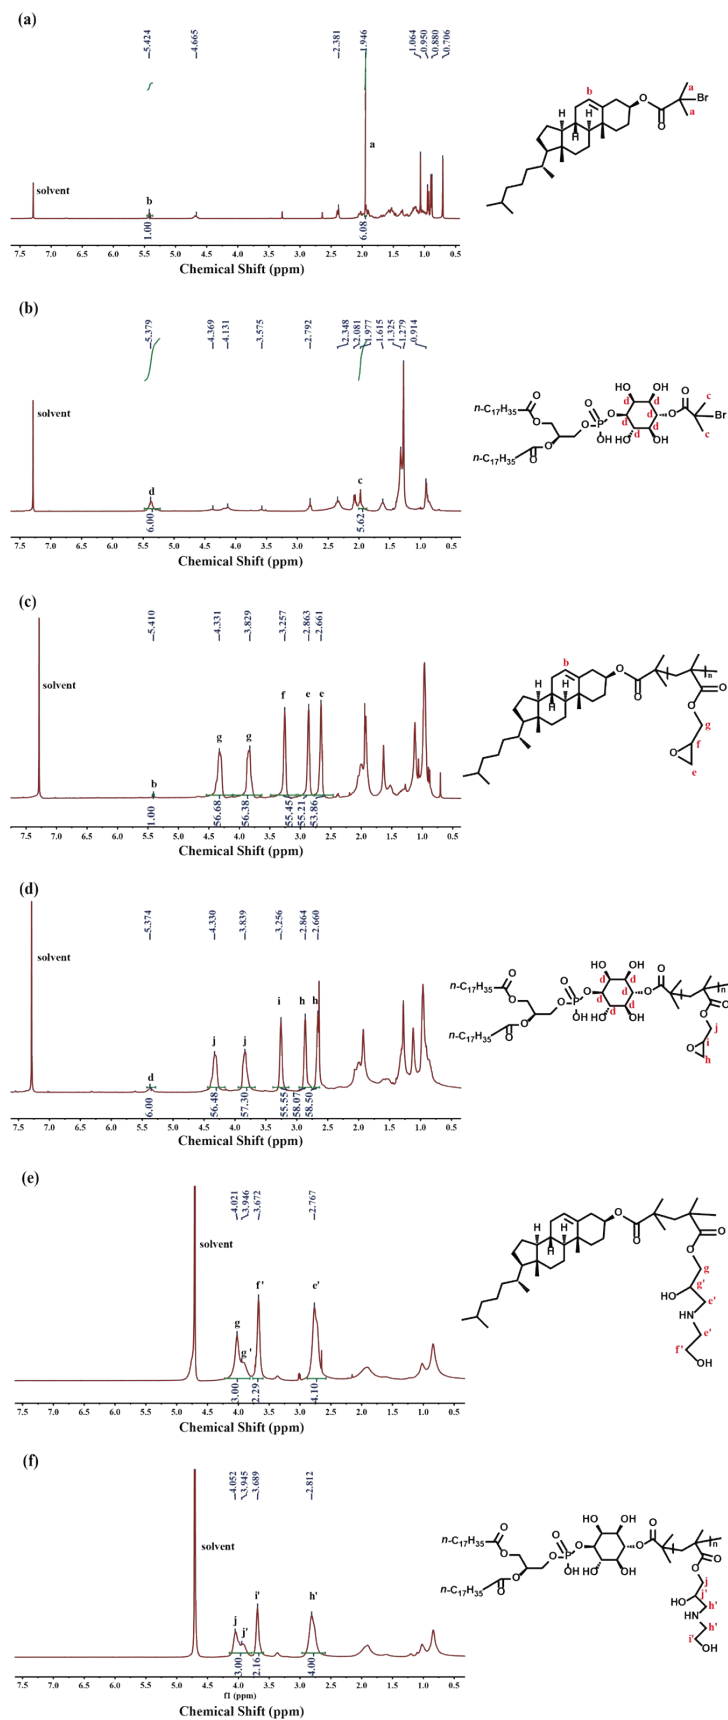

**Fig. S1** <sup>1</sup>H NMR spectra of the (a) CHO-Br, (b) PI-Br, (c) CHO-PGMA2, (d) PI-PGMA2, (e) CHO-PGEA2 and (f) PI-PGEA2.

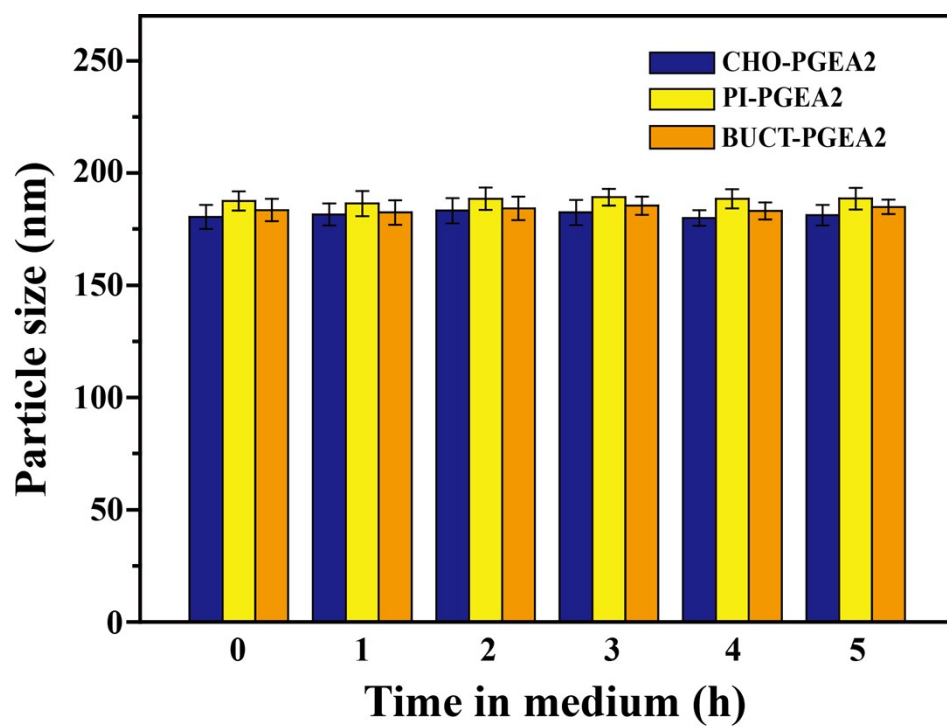

**Fig. S2** Particle size stabilities of the CHO-PGEA2/pDNA, PI-PGEA2/pDNA and BUCT-PGEA2/pDNA at the N/P ratio 20 in medium with 10% FBS.
